# Supplementary material for: Primed by Beauty or Not? How Facial Attractiveness Influences Neural and Behavioral Empathy for Pain
Source: Research Square preprint supplement (doi:10.21203/rs.3.rs-6683265/v1), 2025-06-10
Supplement: Supplementary file 1 [file d9a7ea1029f51071e9bbd8d2.pdf]

*Table 1. Mean and standard error in pain intensity ratings.*

| <b>Priming conditions</b> | <b>Attractiveness conditions</b> | <b>Stimulus conditions</b> | <b>Mean</b> | <b>Standard error</b> |
|---------------------------|----------------------------------|----------------------------|-------------|-----------------------|
| attractive model          | attractive presented model       | non-painful                | 1.38        | 0.06                  |
|                           |                                  | painful                    | 2.84        | 0.14                  |
|                           | unattractive presented model     | non-painful                | 1.59        | 0.08                  |
|                           |                                  | painful                    | 2.98        | 0.11                  |
| unattractive model        | attractive presented model       | non-painful                | 1.34        | 0.05                  |
|                           |                                  | painful                    | 2.82        | 0.14                  |
|                           | unattractive presented model     | non-painful                | 1.55        | 0.07                  |
|                           |                                  | painful                    | 3.10        | 0.11                  |
